# Supplementary material for: Conserved and highly expressed tRNA derived fragments in zebrafish
Source: PubMed Central journal article supplement (PMC4688932; doi:10.1186/s12867-015-0050-8), 2015-12-22
Supplement: 12867_2015_50_MOESM4_ESM.pdf [file 12867_2015_50_MOESM4_ESM.pdf]

| Target gene   |                                                                                  | Free energy | Go Function           | Go Process                                                                               |
|---------------|----------------------------------------------------------------------------------|-------------|-----------------------|------------------------------------------------------------------------------------------|
| <i>Sec23b</i> | target 5' A UUU G G 3'<br>GUG GAAU AUACCCU<br>CGC CUUA UAUGGGGA<br>tRF 3' U G 5' | -25,3       | binding:<br>protein   | developmental process:<br>neurocranium<br>morphogenesis;<br>cartilage development        |
| <i>Ptpa</i>   | target 5' A A CUC U 3'<br>GC GG AAUCAUACCCU<br>CG UC UUAGUAUGGGGA<br>tRF 3' C 5' | -24,6       | catalytic<br>activity | cellular process:<br>metabolic                                                           |
| <i>Myst3</i>  | target 5' A U A A 3'<br>GC GAGAG CGUACCC<br>CG CUCUU GUAUGGGG<br>tRF 3' A A 5'   | -26,7       | binding: DNA          | developmental process:<br>embryonic patterning;<br>cartilage and skeletal<br>development |
| <i>Parva</i>  | target 5' U U UU A 3'<br>GC G AAUUAUACCCU<br>CG C UUAGUAUGGGGA<br>tRF 3' UC 5'   | -23,8       | unknown               | unknown                                                                                  |
| <i>Exoc6</i>  | target 5' A CA G 3'<br>GUGAGG AUACCUU<br>CGCUCU UAUGGGG<br>tRF 3' UAG A 5'       | -19,2       | unknown               | cellular process:<br>exocytosis                                                          |
| <i>Pgm1</i>   | target 5' C UU A 3'<br>G UCAUACCC<br>UC AGUAUGGGG<br>tRF 3' CGC UU A 5'          | -23,1       | catalytic<br>activity | Cellular process:<br>metabolic                                                           |
